# Supplementary material for: Comprehensive Analysis of LincRNAs in Classical and Basal-Like Subtypes of Pancreatic Cancer
Source: MDPI journal article supplement (doi:10.3390/cancers12082077), 2020-07-27
Supplement: s1 [file s1]

*Article*

# **Comprehensive Analysis of LincRNAs in Classical and Basal-Like Subtypes of Pancreatic Cancer**

Markus Glaß, Agnes Dorn, Stefan Hüttelmaier, Monika Haemmerle and Tony Gutschner

**Supplementary Materials**



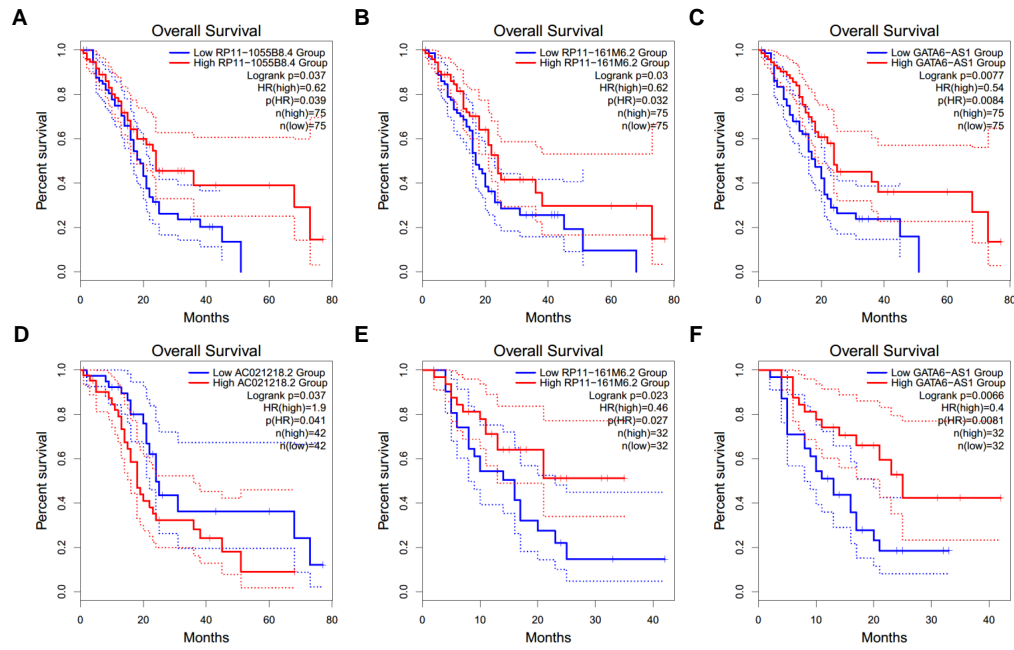

**Figure S2.** LincRNAs with prognostic relevance for overall survival of PAAD patients. (A–F) Overall survival analysis (OS) based on lincRNA expression was performed on both subtypes together ( $n = 150$ ; TCGA PAAD samples) or each subtype individually ( $n = 84$  samples for classical subtype;  $n = 64$  samples for basal subtype) using GEPIA2 (gepia2.cancer-pku.cn). Log-rank test (Mantel-Cox) was used for hypothesis testing. The cox proportional hazard ratio (HR), logrank  $p$ -value and the 95% confidence interval information is shown. Low expression of (A) RP11-1055B8.4, (B) RP11-161M6.2, and (C) GATA6-AS1 is generally associated with worse OS across TCGA PAAD samples. In contrast, high expression of (D) AC021218.2 is associated with poor OS of PDAC patients assigned to the classical subtype, whereas low expression of (E) RP11-161M6.2 and (F) GATA6-AS1 specifically predicts poor OS in the basal subtype.

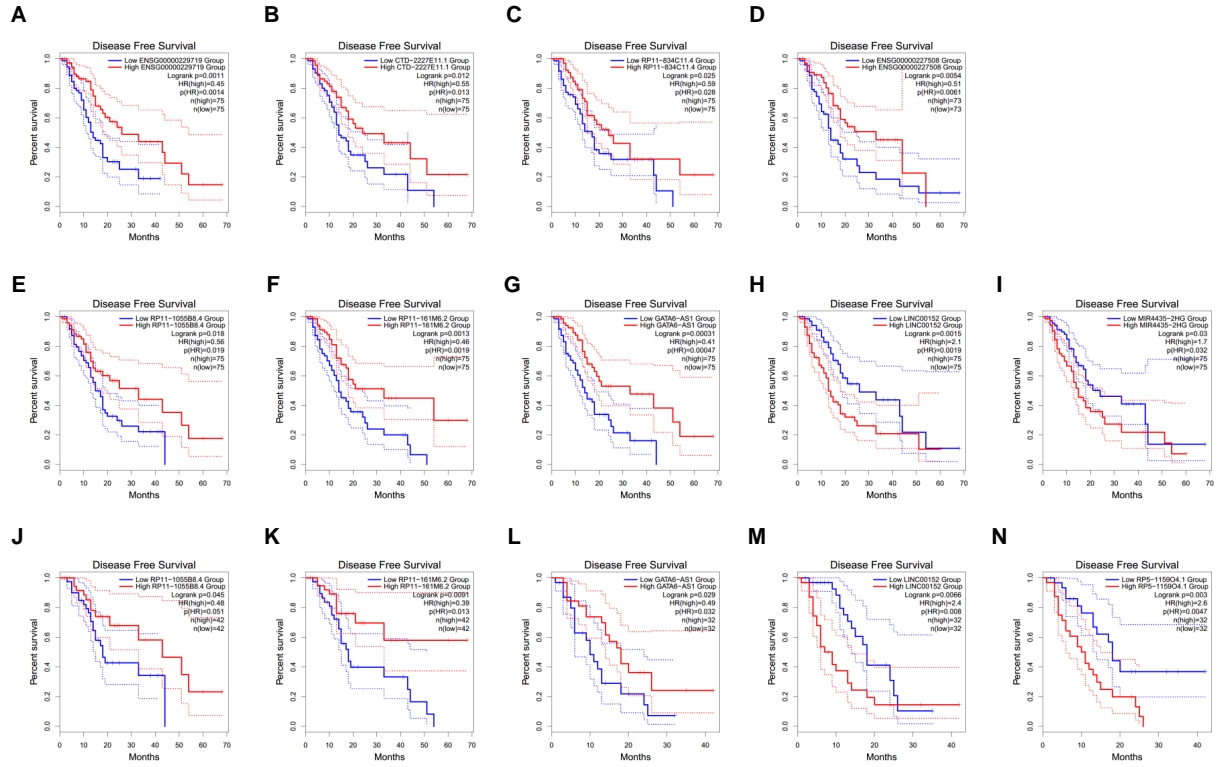

**Figure S3:** LincRNAs with prognostic relevance for disease-free survival of PAAD patients. (A–N) Disease-free survival analysis (DFS) based on lincRNA expression was performed on both subtypes together (A–I; 150 TCGA PAAD samples) or each subtype individually (J,K, classical subtype,  $n = 84$  samples; L–N, basal subtype,  $n = 64$  samples) using GEPIA2 (gepia2.cancer-pku.cn). Low expression of ENSG00000229719/MIR194-2HG (A), CTD-2227E11.1 (B), RP11-834C11.4 (C), ENSG00000227508/LINC01624 (D), RP11-1055B8.4 (E), RP11-161M6.2 (F), and GATA6-AS1 (G) as well as high expression of LINC00152 (H) and MIR435-2HG (I) is associated with poor DFS across PDAC patients. In the classical subtype, low levels of RP11-1055B8.4 (J) and RP11-161M6.2 (K) are predictive of poor DFS, whereas in the basal subtype low expression of GATA6-AS1 (L) as well as high expression of LINC00152 (M) and RP5-1159O4.1 (N) are associated with worse DFS.

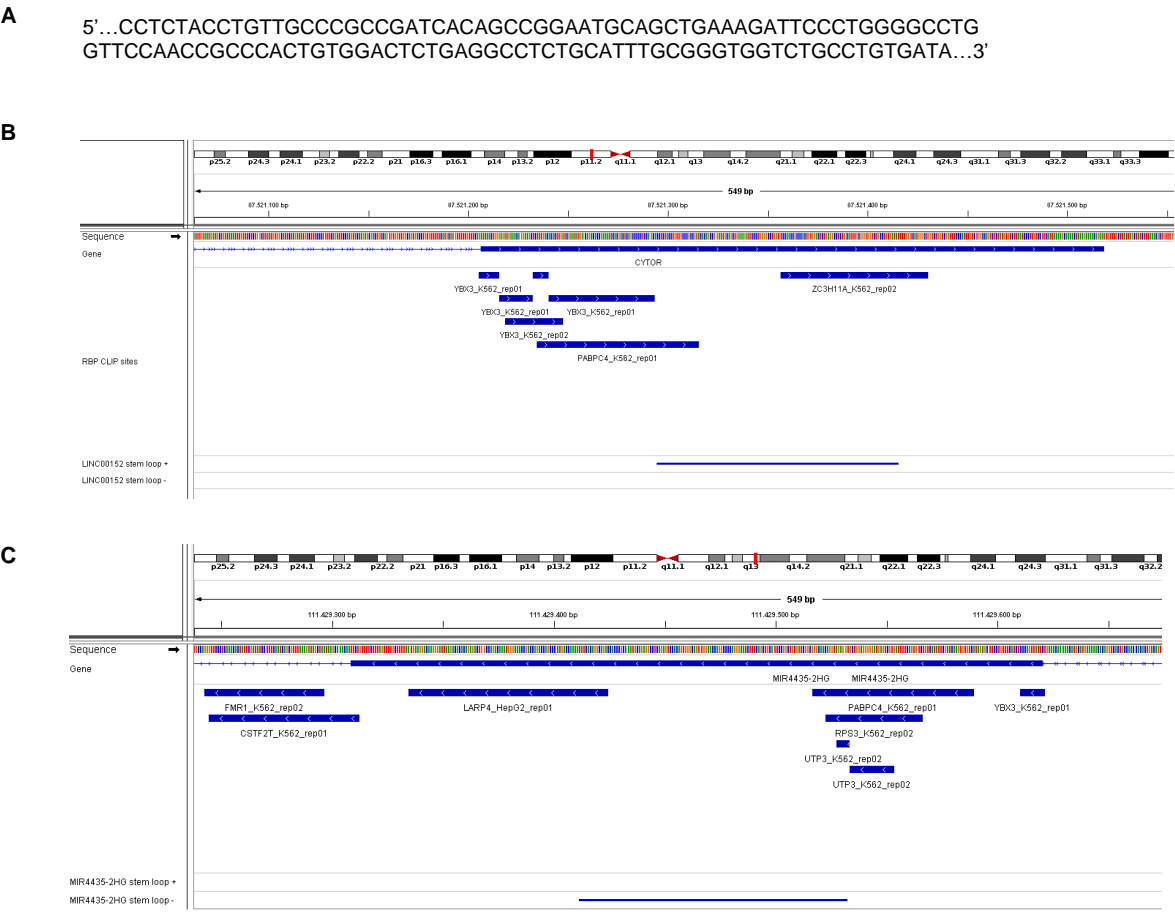

**Figure S4:** M8 stem loop and its putative interaction partners. (A) Sequence of M8 stem loop present in LINC00152. (B) Distribution of eCLIP peaks of RBPs across the stem loop region (blue line) in LINC00152 (CYTOR). (C) eCLIP peaks of RBPs across the stem loop region (blue line) in MIR4435-2HG.

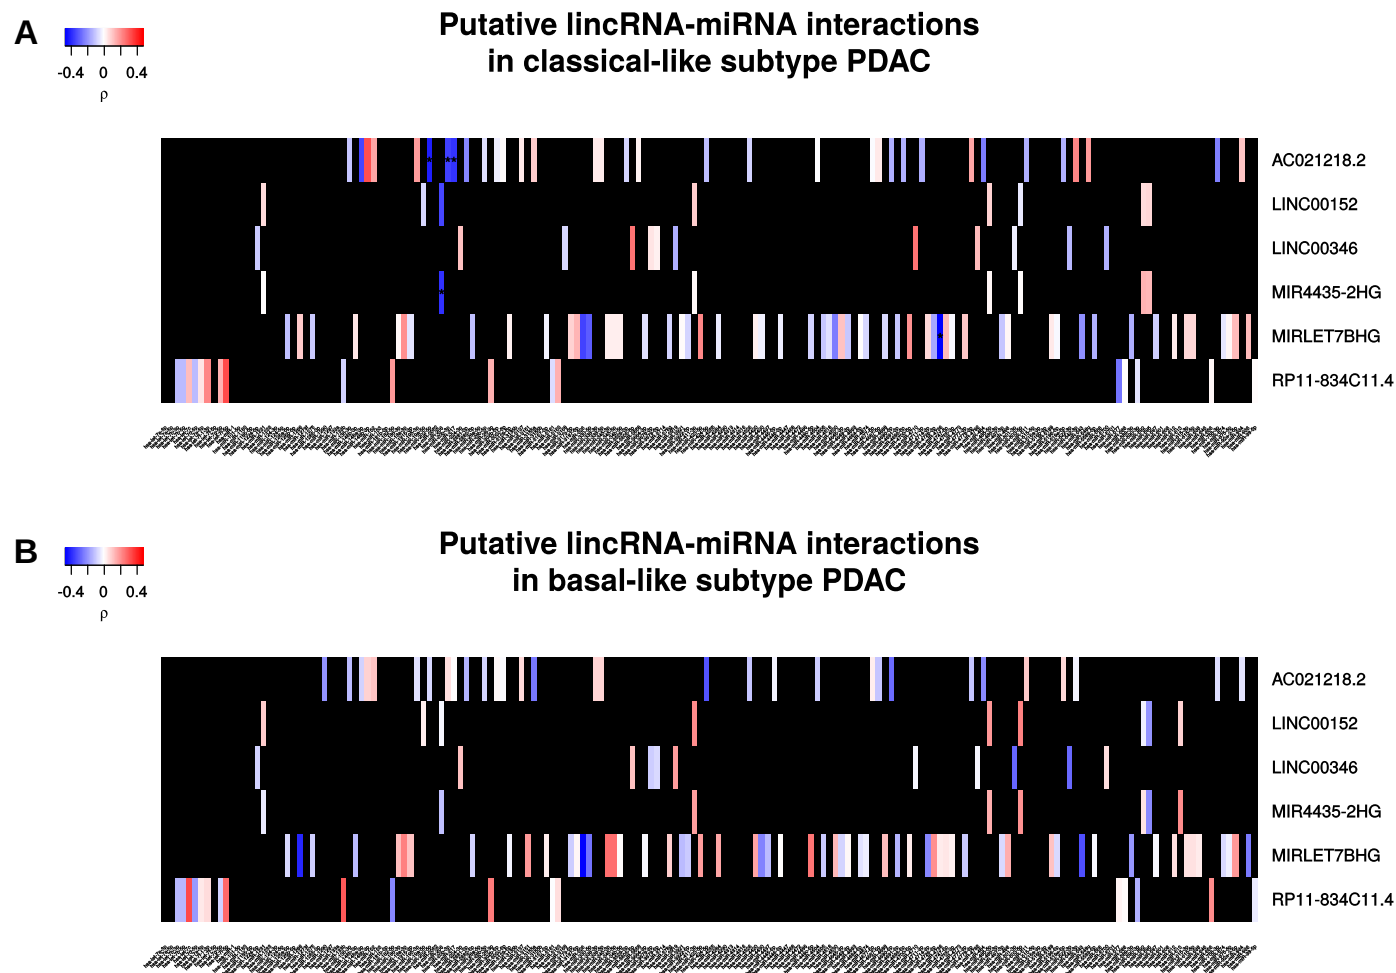

**Figure S5:** Potential targeting of selected lincRNAs by microRNAs. Predicted lincRNA-microRNA interactions and associated Spearman correlation coefficients ( $\rho$ ) in classical (A) or basal-like (B) PDAC subtype samples. "\*" indicates significant ( $FDR < 0.05$ ) Spearman correlation.

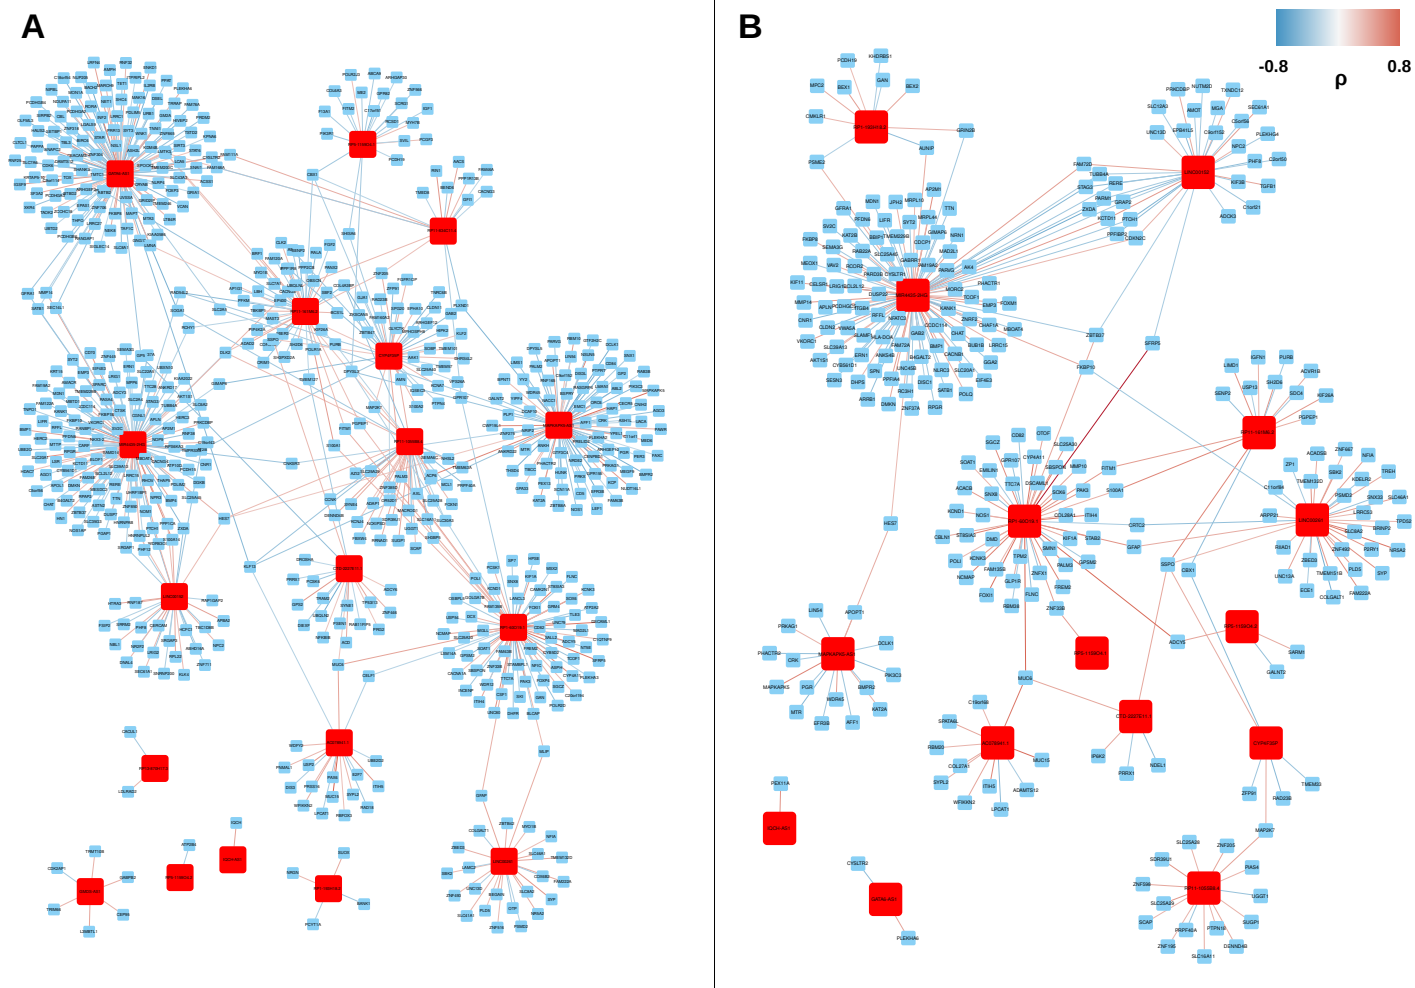

**Figure S6:** Putative interactions between selected lincRNAs and protein-coding transcripts. Red nodes represent lincRNAs and blue nodes mRNAs predicted to be targets of the lincRNAs. Edges are drawn if an interaction between the respective lincRNA-mRNA pair was predicted and associated with a significant ( $FDR < 0.05$ ) positive or negative correlation in RNA expression in classical (**A**) or basal-like (**B**) PDAC subtypes. Edge colors reflect the correlation coefficients.
